# Supplementary material
Source: PubMed Central journal article supplement (PMC4114519)
Supplement: NIHMS615384-supplement-01.pdf [file NIHMS615384-supplement-01.pdf]

**Supplemental on-line Table 1. Polymorphisms with the lowest P-values for association with sensory peripheral neuropathy in White, Black, and Hispanic patients, considering the entire genome.**

|                 | White              |                           |            |       |         | Black              |                           |            |      |         | Hispanic           |                              |            |      |         |
|-----------------|--------------------|---------------------------|------------|-------|---------|--------------------|---------------------------|------------|------|---------|--------------------|------------------------------|------------|------|---------|
|                 | Ca/Co <sup>b</sup> | Gene                      | SNP        | OR    | P       | Ca/Co <sup>b</sup> | Gene                      | SNP        | OR   | P       | Ca/Co <sup>b</sup> | Gene                         | SNP        | OR   | P       |
| <b>Grade ≥1</b> | 40/85              | <i>Intergenic</i>         | rs7244245  | 5.365 | 1.1E-06 | 37/49              | <i>NFE2L3</i>             | rs4722585  | 0.2  | 5.1E-06 | 13/30              | <i>HIF3A</i>                 | rs3826795  | 12.8 | 3.0E-06 |
|                 |                    | <i>MAP2K6</i>             | rs817565   | 3.779 | 2.7E-06 |                    | <i>HPSE2</i>              | rs11189867 | 26.8 | 7.4E-06 |                    | <i>ADCK1<sup>a</sup></i>     | rs4899685  | 14.0 | 3.6E-06 |
|                 |                    | <i>MAP2K6</i>             | rs12451722 | 3.722 | 3.8E-06 |                    | <i>FAM19A2</i>            | rs10784285 | 4.1  | 9.2E-06 |                    | <i>RSP04<sup>a</sup></i>     | rs502716   | 14.0 | 3.6E-06 |
|                 |                    | <i>CALD1</i>              | rs17169635 | 3.526 | 5.6E-06 |                    | <i>FSHR<sup>a</sup></i>   | rs9636436  | 4.7  | 1.0E-05 |                    | <i>STXBP5L</i>               | rs11707293 | 14.2 | 5.2E-06 |
|                 |                    | <i>Intergenic</i>         | rs10216322 | 4.776 | 7.8E-06 |                    | <i>CAMTA1</i>             | rs2412148  | 8.7  | 1.7E-05 |                    | <i>HIF3A</i>                 | rs17801257 | NA   | 6.4E-06 |
| <b>Grade ≥2</b> | 19/85              | <i>GPC6</i>               | rs7985891  | 38.2  | 2.4E-07 | 30/49              | <i>NFE2L3<sup>a</sup></i> | rs4722585  | 0.2  | 5.4E-06 | 9/30               | <i>RSP04<sup>a</sup></i>     | rs502716   | 28.0 | 3.2E-08 |
|                 |                    | <i>KIF20B<sup>a</sup></i> | rs10509586 | 9.3   | 3.8E-07 |                    | <i>FAM49A<sup>a</sup></i> | rs1346751  | 0.1  | 8.3E-06 |                    | <i>LINCOO443<sup>a</sup></i> | rs1330950  | 17.5 | 8.4E-07 |
|                 |                    | <i>Intergenic</i>         | rs6637197  | 14.9  | 1.0E-06 |                    | <i>MRPL45P1</i>           | rs11684168 | 11.5 | 9.5E-06 |                    | <i>FBX031</i>                | rs1062746  | 15.6 | 2.1E-06 |
|                 |                    | <i>IL37<sup>a</sup></i>   | rs2708973  | 31.7  | 2.6E-06 |                    | <i>FSIP1</i>              | rs16969786 | 9.3  | 1.3E-05 |                    | <i>GLIS3</i>                 | rs717423   | 14.1 | 4.1E-06 |
|                 |                    | <i>WDHD1</i>              | rs28489712 | 31.7  | 2.6E-06 |                    | <i>FSIP1</i>              | rs12324408 | 9.3  | 1.3E-05 |                    | <i>IL6R</i>                  | rs8192282  | 23.2 | 4.7E-06 |
| <b>Grade 3</b>  | 8/85               | <i>IL2RA</i>              | rs12722486 | 38.2  | 1.5E-09 | 12/49              | <i>ZNF648</i>             | rs7554182  | 48.5 | 5.7E-08 | 3/30               | <i>TANK</i>                  | rs7568498  | NA   | 2.1E-08 |
|                 |                    | <i>CXCL12<sup>a</sup></i> | rs266095   | 56.3  | 7.8E-09 |                    | <i>LRIG1</i>              | rs9827908  | 48.5 | 5.7E-08 |                    | <i>Intergenic</i>            | rs801350   | NA   | 2.1E-08 |
|                 |                    | <i>CXCL12</i>             | rs266092   | 56.3  | 7.8E-09 |                    | <i>Intergenic</i>         | rs9636436  | 11.1 | 2.2E-07 |                    | <i>Intergenic</i>            | rs801378   | NA   | 2.1E-08 |
|                 |                    | <i>Intergenic</i>         | rs9501753  | NA    | 1.3E-08 |                    | <i>CHST9<sup>a</sup></i>  | rs1514687  | 16.8 | 2.2E-07 |                    | <i>HDAC9</i>                 | rs213273   | NA   | 2.1E-08 |
|                 |                    | <i>PTPRB</i>              | rs17108344 | 25.3  | 2.7E-08 |                    | <i>FSHR<sup>a</sup></i>   | rs10495970 | 10.3 | 5.0E-07 |                    | <i>HDAC9</i>                 | rs213276   | NA   | 2.1E-08 |

<sup>a</sup> These polymorphisms are within 100 kb of the named gene.

<sup>b</sup> Ca/Co indicates cases/controls.

**Supplemental on-line Table 2. Polymorphisms with the lowest P-values for association with sensory peripheral neuropathy in White, Black, and Hispanic patients, considering neuropathy-associated genes<sup>a</sup>**

|                 | White              |                            |            |      |         | Black              |                             |            |      |         | Hispanic           |                           |            |      |         |
|-----------------|--------------------|----------------------------|------------|------|---------|--------------------|-----------------------------|------------|------|---------|--------------------|---------------------------|------------|------|---------|
|                 | Ca/Co <sup>b</sup> | Gene                       | SNP        | OR   | P       | Ca/Co <sup>b</sup> | Gene                        | SNP        | OR   | P       | Ca/Co <sup>b</sup> | Gene                      | SNP        | OR   | P       |
| <b>Grade ≥1</b> | 40/85              | <i>KIF1A</i>               | rs11886288 | 0.1  | 4.6E-04 | 37/49              | <i>CCDC19</i>               | rs2501325  | 0.2  | 1.3E-03 | 13/30              | <i>NEFL</i> <sup>c</sup>  | rs6557786  | 12.9 | 2.7E-04 |
|                 |                    | <i>SPTLC2</i> <sup>c</sup> | rs7145386  | 3.5  | 8.9E-04 |                    | <i>LITAF</i> <sup>c</sup>   | rs13333308 | 13.4 | 2.0E-03 |                    | Intergenic                | rs32147    | 5.0  | 1.3E-03 |
|                 |                    | <i>SPTLC2</i> <sup>c</sup> | rs11159273 | 0.3  | 9.4E-04 |                    | <i>KIF1B</i>                | rs4475756  | 2.8  | 2.0E-03 |                    | <i>GDAP1</i>              | rs3780014  | 0.2  | 1.7E-03 |
|                 |                    | <i>SPTLC1</i> <sup>c</sup> | rs7045602  | 3.6  | 1.3E-03 |                    | <i>KIF1B</i>                | rs8019     | 2.6  | 2.6E-03 |                    | <i>SBF2</i>               | rs12808226 | 5.6  | 1.8E-03 |
|                 |                    | <i>SH3TC2</i>              | rs3763022  | 2.3  | 2.1E-03 |                    | <i>GAN</i> <sup>c</sup>     | rs8044853  | 2.6  | 3.0E-03 |                    | <i>NEFL</i> <sup>c</sup>  | rs17763685 | NA   | 1.9E-03 |
| <b>Grade ≥2</b> | 19/85              | <i>SPTLC1</i> <sup>c</sup> | rs7045602  | 5.2  | 2.4E-04 | 30/49              | <i>LITAF</i> <sup>c</sup>   | rs13333308 | 17.1 | 4.6E-04 | 9/30               | <i>NEFL</i> <sup>c</sup>  | rs6557786  | 23.2 | 4.7E-06 |
|                 |                    | <i>SBF2</i>                | rs4243951  | 0.2  | 2.9E-04 |                    | <i>FAM134B</i>              | rs162848   | 0.2  | 1.2E-03 |                    | <i>NEFL</i> <sup>c</sup>  | rs17830286 | 11.2 | 9.8E-05 |
|                 |                    | <i>NEFL</i> <sup>c</sup>   | rs3757985  | 0.1  | 1.1E-03 |                    | <i>GAN</i> <sup>c</sup>     | rs8044853  | 2.9  | 1.7E-03 |                    | <i>NEFL</i> <sup>c</sup>  | rs17763685 | NA   | 1.8E-04 |
|                 |                    | <i>SH3TC2</i> <sup>c</sup> | rs10045726 | 3.2  | 1.2E-03 |                    | <i>FAM134B</i> <sup>c</sup> | rs149511   | 0.3  | 2.0E-03 |                    | <i>MFN2</i> <sup>c</sup>  | rs12759042 | 6.5  | 9.5E-04 |
|                 |                    | <i>SH3TC2</i>              | rs6580590  | 3.2  | 1.2E-03 |                    | <i>NEFL</i> <sup>c</sup>    | rs3757985  | 2.9  | 2.3E-03 |                    | <i>PMP22</i> <sup>c</sup> | rs230930   | 6.1  | 1.3E-03 |
| <b>Grade 3</b>  | 8/85               | <i>KIF1A</i> <sup>c</sup>  | rs10199388 | 5.3  | 8.4E-04 | 12/49              | <i>LITAF</i> <sup>c</sup>   | rs13333308 | 32.3 | 6.0E-06 | 3/30               | <i>NEFL</i> <sup>c</sup>  | rs17763685 | NA   | 5.6E-06 |
|                 |                    | <i>SPTLC2</i> <sup>c</sup> | rs7145386  | 5.5  | 2.3E-03 |                    | <i>HMCN2</i>                | rs914977   | 6.5  | 1.0E-04 |                    | <i>BSCL2</i>              | rs575134   | NA   | 5.6E-06 |
|                 |                    | <i>SH3TC2</i>              | rs10477401 | 12.0 | 2.8E-03 |                    | <i>HMCN2</i>                | rs2039463  | 6.8  | 1.2E-04 |                    | <i>NEFL</i> <sup>c</sup>  | rs6557786  | 29.0 | 3.8E-05 |
|                 |                    | <i>KIF1A</i> <sup>c</sup>  | rs6437363  | 4.5  | 2.8E-03 |                    | <i>FAM134B</i>              | rs256880   | 0.2  | 2.7E-03 |                    | <i>ZNF622</i>             | rs10520840 | 14.0 | 1.0E-03 |
|                 |                    | <i>PMP22</i> <sup>c</sup>  | rs230924   | 4.2  | 4.6E-03 |                    | <i>WDR54</i> <sup>c</sup>   | rs2268424  | 4.4  | 4.2E-03 |                    | <i>NEFL</i> <sup>c</sup>  | rs17830286 | 14.0 | 1.0E-03 |

<sup>a</sup> The neuropathy-associated genes from the Inherited Peripheral Neuropathies Mutation Database<sup>7</sup> plus *DNMT1* and *KIF1A*.

<sup>b</sup> Ca/Co indicates cases/controls.

<sup>c</sup> These polymorphisms are within 100 kb of the named gene.

### Supplemental On-line Table 3: Neuropathy-associated genes

| Chromosome | Start Position <sup>a</sup> | Stop Position | Gene     |
|------------|-----------------------------|---------------|----------|
| 1          | 10143350                    | 10414248      | KIF1B    |
| 1          | 154301084                   | 154426502     | LMNA     |
| 1          | 11912824                    | 12046159      | MFN2     |
| 1          | 159491148                   | 159596386     | MPZ      |
| 1          | 115778537                   | 115930857     | NGFB     |
| 1          | 155002165                   | 155168266     | NTRK1    |
| 1          | 6398738                     | 6552656       | PLEKHG5  |
| 1          | 32963426                    | 33106220      | YARS     |
| 2          | 74391789                    | 74511472      | DCTN1    |
| 2          | 241251856                   | 241458297     | KIF1A    |
| 3          | 129877668                   | 130066331     | RAB7A    |
| 5          | 10253281                    | 10369501      | CCT5     |
| 5          | 16476146                    | 16720118      | FAM134B  |
| 5          | 148291905                   | 148472930     | SH3TC2   |
| 6          | 110069116                   | 110303327     | FIG4     |
| 7          | 30550705                    | 30690173      | GARS     |
| 7          | 75719858                    | 75821548      | HSPB1    |
| 8          | 1709555                     | 1944214       | ARHGEF10 |
| 8          | 75375172                    | 75491890      | GDAP1    |
| 8          | 134268595                   | 134428680     | NDRG1    |
| 8          | 24814385                    | 24920043      | NEFL     |
| 9          | 110619620                   | 110786429     | IKBKAP   |
| 9          | 134076647                   | 134270193     | SETX     |
| 9          | 93783247                    | 93967511      | SPTLC1   |
| 10         | 64191762                    | 64296133      | EGR2     |
| 11         | 62164322                    | 62281446      | BSCL2    |
| 11         | 68377894                    | 68514645      | IGHMBP2  |
| 11         | 95155693                    | 95347019      | MTMR2    |
| 11         | 9706789                     | 10322330      | SBF2     |
| 12         | 32496360                    | 32734940      | FGD4     |
| 12         | 118050977                   | 118166934     | HSPB8    |
| 12         | 682485                      | 940879        | WNK1     |
| 14         | 50949800                    | 51149786      | ATL1     |
| 14         | 76993022                    | 77202863      | SPTLC2   |
| 15         | 32259488                    | 32467557      | SLC12A6  |
| 16         | 79856075                    | 80021441      | GAN      |
| 16         | 11499356                    | 11637730      | LITAF    |
| 17         | 15023820                    | 15159369      | PMP22    |
| 17         | 72739086                    | 73058273      | SEPT9    |
| 18         | 75490788                    | 75665495      | CTDP1    |
| 19         | 10639754                    | 10853579      | DNM2     |
| 19         | 10055021                    | 10216811      | DNMT1    |
| 19         | 45541510                    | 45661111      | PRX      |
| 22         | 36648264                    | 36760485      | SOX10    |
| X          | 70301786                    | 70411777      | GJB1     |
| X          | 106708309                   | 106830912     | PRPS1    |

<sup>a</sup> Chromosome start and stop positions span the regions included in genetic analyses for each gene, and are based on genomic build 37.
